# Supplementary material for: Genotype-by-Environment Interaction in Tepary Bean (Phaseolus acutifolius A. Gray) for Seed Yield
Source: MDPI journal article supplement (doi:10.3390/agronomy13010012), 2022-12-21
Supplement: s1 [file s1]

## Supplementary Tables

**Table S1:** Combined analysis of variance for seed yield and days to maturity in 45 tepary bean genotypes evaluated across two seasons and four environments

| Source of variation                | Df   | Mean square |           |
|------------------------------------|------|-------------|-----------|
|                                    |      | SY          | DTM       |
| Replication (Season x Environment) | 9    | 80368       | 0.0001    |
| Genotype                           | 44   | 504816      | 135.8114  |
| Season                             | 1    | 12605156    | 205.4083  |
| Environment                        | 3    | 11496587    | 3010.5194 |
| Genotype x Season                  | 44   | 198018      | 6.0788    |
| Genotype x Environment             | 132  | 68621       | 27.9058   |
| Season x Environment               | 3    | 753706      | 59.4306   |
| Genotype x Environment x Season    | 132  | 65151       | 4.0328    |
| Residual                           | 718  | 16956       | 0.6263    |
| Total                              | 1079 | 102200      | 18.4192   |

df: degrees of freedom, SY: seed yield, DTM: days to 90% physiological maturity

**Table S2:** Days to maturity for 45 tepary bean genotypes evaluated across  
two seasons and four environments

| Genotype    | E1   | E2     | Genotype | E1   | E2            | Genotype | E1 | E2 |
|-------------|------|--------|----------|------|---------------|----------|----|----|
| G1          | 80   | 78     | G23      | 81   | 79            | G37      | 76 | 73 |
| G10         | 89   | 79     | G24      | 85   | 80            | G38      | 81 | 78 |
| G11         | 86   | 82     | G25      | 82.5 | 79            | G39      | 86 | 76 |
| G12         | 89   | 78     | G26      | 82   | 80            | G4       | 83 | 78 |
| G13         | 79   | 74     | G27      | 88   | 80            | G40      | 85 | 78 |
| G14         | 83   | 78     | G28      | 84   | 79            | G41      | 78 | 75 |
| G15         | 84   | 79     | G29      | 89   | 80            | G42      | 82 | 78 |
| G16         | 82   | 79     | G3       | 89   | 78            | G43      | 86 | 79 |
| G17         | 76   | 74     | G30      | 84   | 79            | G44      | 81 | 79 |
| G18         | 87   | 79     | G31      | 86   | 80            | G45      | 81 | 78 |
| G19         | 83   | 78     | G32      | 84   | 80.5          | G5       | 79 | 76 |
| G2          | 86   | 79     | G33      | 85   | 79            | G6       | 89 | 80 |
| G20         | 82   | 80     | G34      | 83   | 80            | G7       | 84 | 80 |
| G21         | 83   | 80     | G35      | 82   | 79            | G8       | 83 | 76 |
| G22         | 83   | 79     | G36      | 87   | 84            | G9       | 84 | 80 |
| Environment | MEAN | SEASON | E 1      | E2   | Grand<br>mean | CV%      |    |    |
| E1          | 84   | 1      | 84       | 79   | 79.98         | 1.44     |    |    |
| E2          | 79   | 2      | 84       | 79   |               |          |    |    |

CV% = Coefficient of variation

Table S2: Continued

| Genotype    | E3   | E4     | Genotype | E3   | E4         | Genotype | E3   | E4   |
|-------------|------|--------|----------|------|------------|----------|------|------|
| G1          | 78.5 | 73     | G23      | 79   | 74         | G37      | 76.5 | 73   |
| G10         | 81   | 74     | G24      | 84   | 76         | G38      | 81   | 78   |
| G11         | 79   | 70     | G25      | 81   | 78         | G39      | 84   | 81   |
| G12         | 86   | 79     | G26      | 79   | 75         | G4       | 82.5 | 74   |
| G13         | 76   | 76     | G27      | 87   | 83         | G40      | 83   | 81.5 |
| G14         | 80   | 75     | G28      | 83   | 77.5       | G41      | 73   | 70   |
| G15         | 81   | 71     | G29      | 86.5 | 74.5       | G42      | 77   | 74   |
| G16         | 79   | 76     | G3       | 87   | 81         | G43      | 81   | 78   |
| G17         | 73   | 73     | G30      | 82   | 79.5       | G44      | 78   | 78   |
| G18         | 84   | 72     | G31      | 83.5 | 79         | G45      | 78   | 72   |
| G19         | 80   | 78     | G32      | 82   | 80         | G5       | 77.5 | 70   |
| G2          | 85   | 74.5   | G33      | 81   | 76         | G6       | 87   | 73   |
| G20         | 79   | 75     | G34      | 81.5 | 80         | G7       | 81   | 75   |
| G21         | 80   | 72     | G35      | 81   | 76.5       | G8       | 83   | 77   |
| G22         | 83   | 74     | G36      | 84.5 | 75.5       | G9       | 81   | 79   |
| Environment | MEAN | SEASON | E 3      | E4   | Grand mean | CV%      |      |      |
| E3          | 81   | 1      | 80       | 75   | 79.98      | 1.44     |      |      |
| E4          | 76   | 2      | 82       | 77   |            |          |      |      |

**Table S3:** Selection differential for mean performance and weighted average of the stability and mean performance (WAASBY) scores for seed yield and days to maturity in 45 tepary bean genotypes evaluated across two seasons and four environments.

| Mean performance |        |       |       |       | WAASBY |      |       |       |
|------------------|--------|-------|-------|-------|--------|------|-------|-------|
| Trait            | XO     | XS    | SD    | %SD   | XO     | XS   | SD    | %SD   |
| Seed yield       | 498.33 | 474.5 | -23.8 | -4.78 | 2.2    | 0.63 | -1.58 | -71.6 |
| Days to maturity | 79.8   | 79.45 | -0.33 | -0.41 | 0.47   | 0.21 | -0.25 | -54.2 |

Xo = population mean, Xs = mean of selected genotypes, SD = selection differential.

**Table S4:** Multi trait stability index (MTSI) values for 45 tepary bean genotypes evaluated across two seasons and four environments

| Genotype | MTSI | Genotype | MTSI | Genotype | MTSI |
|----------|------|----------|------|----------|------|
| G1       | 2.48 | G16      | 2.46 | G31      | 1.59 |
| G2       | 1.72 | G17      | 3.38 | G32      | 2.39 |
| G3       | 3.06 | G18      | 4.39 | G33      | 0.32 |
| G4       | 1.25 | G19      | 2.82 | G34      | 2.48 |
| G5       | 1.7  | G20      | 1.07 | G35      | 2.03 |
| G6       | 2.99 | G21      | 3.29 | G36      | 2.99 |
| G7       | 2.79 | G22      | 0.93 | G37      | 1.45 |
| G8       | 2.97 | G23      | 0.79 | G38      | 1.41 |
| G9       | 2.09 | G24      | 1.52 | G39      | 3.57 |
| G10      | 2.69 | G25      | 0.83 | G40      | 2.57 |
| G11      | 3.67 | G26      | 2.82 | G41      | 1.64 |
| G12      | 2.66 | G27      | 3.57 | G42      | 0.99 |
| G13      | 2.02 | G28      | 1.28 | G43      | 0.43 |
| G14      | 0.34 | G29      | 3.73 | G44      | 1.79 |
| G15      | 2.77 | G30      | 1.88 | G45      | 1.7  |
